# Supplementary material for: Knowledge, attitude and practices of insulin therapy among patients with type 2 diabetes: a cross-sectional study
Source: HighWire-hosted journal article supplement (doi:10.1136/bmjopen-2023-079693), 2024-03-01
Supplement: bmjopen-2023-079693supp001_data_supplement.pdf [file bmjopen-2023-079693supp001_data_supplement.pdf]

Demographic and clinical characteristics of type 2 diabetic patients

|                                                                                                                                                                                                                                                                                            |                                                                                                                                                                                 |
|--------------------------------------------------------------------------------------------------------------------------------------------------------------------------------------------------------------------------------------------------------------------------------------------|---------------------------------------------------------------------------------------------------------------------------------------------------------------------------------|
| MRN:<br>Age:                                                                                                                                                                                                                                                                               | Gender:<br><input type="checkbox"/> Male<br><input type="checkbox"/> Female                                                                                                     |
| Education:<br><input type="checkbox"/> No formal education<br><input type="checkbox"/> Primary<br><input type="checkbox"/> Secondary<br><input type="checkbox"/> Higher education                                                                                                          | Occupation:<br><input type="checkbox"/> Full-time job<br><input type="checkbox"/> Part-time job<br><input type="checkbox"/> Unemployed                                          |
| Duration of diabetes mellitus:<br>.....                                                                                                                                                                                                                                                    | Number of anti-diabetic medication:<br><input type="checkbox"/> 1 <input type="checkbox"/> 2 <input type="checkbox"/> 3 <input type="checkbox"/> >3                             |
| Insulin therapy was initiated for the following reasons:<br><input type="checkbox"/> Uncontrolled Diabetes Mellitus<br><input type="checkbox"/> Self-preference<br><input type="checkbox"/> Contra-indication to oral hypoglycemic medication<br><input type="checkbox"/> Others, Specify: | Type of insulin use:<br><input type="checkbox"/> Short-acting<br><input type="checkbox"/> Long acting<br><input type="checkbox"/> Both<br><input type="checkbox"/> intermediate |
| Insulin device used:<br><input type="checkbox"/> Syringe<br><input type="checkbox"/> Pen                                                                                                                                                                                                   | Duration of insulin use:                                                                                                                                                        |
| Most recent HBA1C level:<br>.....                                                                                                                                                                                                                                                          | Frequency of blood sugar monitoring:<br><input type="checkbox"/> Daily<br><input type="checkbox"/> Weekly<br><input type="checkbox"/> Monthly                                   |
| Do you attend your follow up appointment regularly?<br><input type="checkbox"/> Yes<br><input type="checkbox"/> No                                                                                                                                                                         | Do you have history of: (Micro vascular complications)<br><input type="checkbox"/> Retinopathy<br><input type="checkbox"/> Nephropathy<br><input type="checkbox"/> Neuropathy   |
| Do you have history of: (Macro vascular complications)<br><input type="checkbox"/> Peripheral vascular disease<br><input type="checkbox"/> ischemic heart disease<br><input type="checkbox"/> Stroke                                                                                       | I take insulin injection by:<br><input type="checkbox"/> My self<br><input type="checkbox"/> I have help provided by my family/caregiver                                        |

Knowledge assessments: For each statement, check whether you agree, disagree.

| Statement                                                                                                                 | Agree | Disagree |
|---------------------------------------------------------------------------------------------------------------------------|-------|----------|
| Insulin prevents the complications of diabetes through controlling HBA1C                                                  |       |          |
| Insulin works better than pills                                                                                           |       |          |
| Insulin is usually prescribed as a last option in the treatment                                                           |       |          |
| Insulin when started, has to continued life-long                                                                          |       |          |
| Insulin dose has to be increased once you begin to use it                                                                 |       |          |
| Insulin vial is stored in the refrigerator or a cool place                                                                |       |          |
| The sites for insulin injection are abdomen, thigh, glutei and deltoid                                                    |       |          |
| The complications of insulin therapy are low blood sugar, insulin allergy, weight gain and wasting of subcutaneous tissue |       |          |

Attitude assessment: For each statement, check whether you agree, disagree

| Statement                                                                               | Agree | Disagree |
|-----------------------------------------------------------------------------------------|-------|----------|
| I worry that people will know I have diabetes if I am on insulin treatment              |       |          |
| Injecting insulin is embarrassing, I worry about being seen when I inject insulin       |       |          |
| Injecting insulin is painful                                                            |       |          |
| I worry that it would negatively impact my job, restrict my activities and hold me back |       |          |
| I worry about needing to perform home blood sugar monitoring                            |       |          |
| I do not have enough time for regular doses of insulin                                  |       |          |
| The idea of insulin injection is overwhelming                                           |       |          |

Practice assessment: For each statement, check whether you agree, disagree

| Statement                                                       | Agree | Disagree |
|-----------------------------------------------------------------|-------|----------|
| Checks the name and type of insulin                             |       |          |
| Verifies the expiry date of insulin                             |       |          |
| Adjusts the dose of insulin as needed                           |       |          |
| Washes hands prior to injection                                 |       |          |
| Removing air bubbles from the insulin syringe before injecting  |       |          |
| Syringe / needle head should be used for one time only          |       |          |
| Disposal of used insulin needles in a special container at home |       |          |
| Rotates injection sites regularly                               |       |          |
| Takes insulin injections regularly on the times instructed      |       |          |
